# Supplementary material
Source: ML conference proceedings conference paper supplement (https://openaccess.thecvf.com/content/ICCV2023/html/Yun_Achievement-Based_Training_Progress_ICCV_2023_paper.html)
Supplement: Supplementary file 1 [file Yun_Achievement-Based_Training_Progress_ICCV_2023_supplemental.pdf]

# Supplementary Material: Achievement-based Training Progress Balancing for Multi-Task Learning

Hayoung Yun and Hanjoo Cho\*  
Samsung Research

{hayoung.yun, hanjoo.cho}@samsung.com

## A. Training Details for the NYU v2 dataset

### A.1. Network Architecture

We employed ResNet50 [7] with dilated convolutions [1] as backbone. Dilated convolutions were applied for stages 3 and 4 to replace with stride convolutions to keep the feature size. As a result, the feature size of backbone output enlarges from 15 x 20 to 60 x 80. We performed prediction using the DeepLabV3 [2] predictor on the output features. Due to the significant computational burden of the ASPP (atrous spatial pyramid pooling) module in DeepLab, we designed our architecture so that all tasks share a single ASPP, rather than each task having its own ASPP as in previous approaches [9, 8, 16]. The numbers of GMAC (Giga Multiply-Accumulate Operations) for different single-task and multi-task models are described in Table A. Our multi-task models reduced the number of computations to 33.00% by sharing ASPP, whereas the multi-task models with individual ASPP for each task reduced to 60.58% (Table B).

|                  | ResNet50 | ASPP   | Prediction | Total   |
|------------------|----------|--------|------------|---------|
| segmentation     | 116.800  | 72.038 | 2.880      | 191.718 |
| depth estimation | 116.800  | 72.038 | 2.832      | 191.670 |
| surface normal   | 116.800  | 72.038 | 2.834      | 191.672 |
| multi-task       | 116.800  | 72.038 | 8.536      | 197.385 |

Table A. GMAC comparison for single-task and multi-task models

### A.2. Training configurations

We trained single-task and multi-task models for 100 epochs with a batch size of 8. We adopted an ADAM optimizer with a momentum of 0.9 and a weight decay of  $5e-4$ . We tried 10 times for each of the learning rates of  $8e-4$ ,  $4e-4$ ,  $2e-4$ ,  $1e-4$ , and  $8e-5$ , scheduled by cosine decay without warmup. We selected the multi-task model with the best  $Acc_{MTL}$  of each trial and computed their average accuracy metrics for each learning rate, excluding the maximum and minimum accuracy (hence, the average of eight).

\*Corresponding author

## B. Experimental Results for the NYU dataset

### B.1. Detailed Results for Various Prediction Heads

In this subsection, we will demonstrate the detailed results for various prediction heads, depicted in Table 2, which were shared DeepLabV3, shared DeepLabV3+, individual DeepLabV3, and individual DeepLabV3+. The numbers of GMAC for the architectures were shown in Table B. The results of DeepLabV3 with shared ASPP were presented in Table 1. Then, we provided the results for DeepLabV3+ with shared ASPP (Table C), and individual ASPP with DeepLabV3 (Table D) and DeepLabV3+ (Table E).

| ASPP       | Head           | ResNet50 | ASPP   | Prediction | Total  |
|------------|----------------|----------|--------|------------|--------|
| Shared     | DeepLabV3 [2]  | 116.80   | 72.04  | 8.54       | 197.39 |
|            | DeepLabV3+ [3] | 116.80   | 72.04  | 17.67      | 206.51 |
| Individual | DeepLabV3 [2]  | 116.80   | 216.11 | 8.54       | 341.46 |
|            | DeepLabV3+ [3] | 116.80   | 216.11 | 18.93      | 351.84 |

Table B. GMAC comparison for different network architectures

### B.2. Results for the MobileNetV2 Backbone

The detailed results for the MobileNetV2 [12] backbone were described in Table F. Because the output feature size of the MobileNet backbone was significantly reduced by 32, we employed the shared DeepLabV3+ prediction head to exploit high resolution features.

### B.3. Results for the EfficientNetV2 Backbone

The detailed results for the EfficientNetV2-S [12] backbone were described in Table G. Like MobileNetV2, the output feature size was reduced by 32, so the DeepLabV3+ prediction head was employed.

### B.4. Segmentation and Depth Estimation

The experimental results for two tasks, semantic segmentation and depth estimation, were described in Table H.

| methods        |              | segmentation    | depth estimation    |                   | surface normal    |                     |                  | total                |                         |        |
|----------------|--------------|-----------------|---------------------|-------------------|-------------------|---------------------|------------------|----------------------|-------------------------|--------|
|                |              | $mIoU \uparrow$ | $\delta_1 \uparrow$ | $rmse \downarrow$ | $mean \downarrow$ | $median \downarrow$ | 11.25 $\uparrow$ | $Acc_{MTL} \uparrow$ | $\Delta_{MTL} \uparrow$ | $time$ |
| Single-Task    |              | 0.4449          | 0.8054              | 0.5801            | 19.4138           | 13.2616             | 0.4536           | 0.3986               | 0.00%                   |        |
| Constant       | Uniform      | 0.4447          | 0.8098              | 0.5756            | 22.7259           | 17.4917             | 0.3377           | 0.3683               | -8.07%                  | 30.98  |
| Scale-based    | RLW [8]      | 0.4436          | 0.8084              | 0.5765            | 22.8454           | 17.6649             | 0.3326           | 0.3665               | -8.55%                  | 31.55  |
|                | DWA [11]     | 0.4429          | 0.8108              | 0.5760            | 22.7235           | 17.5215             | 0.3369           | 0.3677               | -8.25%                  | 30.77  |
|                | GLS [5]      | 0.4313          | 0.8238              | 0.5606            | 20.8125           | 15.1440             | 0.3954           | 0.3835               | -3.88%                  | 31.27  |
| Gradient-based | MGDA [13]    | 0.2896          | 0.7670              | 0.6231            | 19.2335           | 13.1608             | 0.4562           | 0.3394               | -13.41%                 | 76.78  |
|                | PCGrad [17]  | 0.4439          | 0.8019              | 0.5841            | 23.9044           | 18.8431             | 0.3097           | 0.3581               | -11.04%                 | 58.02  |
|                | CAGrad [9]   | 0.4440          | 0.8021              | 0.5824            | 23.9114           | 18.8163             | 0.3103           | 0.3584               | -10.94%                 | 58.99  |
|                | GradNorm [4] | 0.4429          | 0.7850              | 0.5972            | 22.3589           | 16.8694             | 0.3542           | 0.3677               | -8.21%                  | 36.19  |
|                | IMTL-G [10]  | 0.4346          | 0.8039              | 0.5799            | 20.5369           | 14.7189             | 0.4082           | 0.3838               | -3.78%                  | 35.33  |
|                | IMTL [10]    | 0.4200          | 0.7897              | 0.5935            | 20.9657           | 14.9806             | 0.4017           | 0.3746               | -6.18%                  | 57.85  |
| Accuracy-based | DTP [6]      | 0.4422          | 0.7513              | 0.6225            | 22.4029           | 16.8250             | 0.3557           | 0.3625               | -9.63%                  | 31.46  |
|                | AMTL         | 0.4344          | 0.8211              | 0.5670            | 20.8688           | 15.1885             | 0.3943           | 0.3831               | -3.98%                  | 30.65  |

Table C. Comparison to the benchmark and proposed multi-task losses for the DeepLabV3+ prediction head with shared ASPP on the NYU v2 dataset.  $mIoU$ ,  $\delta_1$ , 11.25,  $Acc_{MTL}$ , and  $\Delta_{MTL}$  are better when higher while  $rmse$ ,  $mean$ , and  $median$  are better when lower.  $time$  denotes the average training time for epoch in seconds.

| methods        |              | segmentation    | depth estimation    |                   | surface normal    |                     |                  | total                |                         |        |
|----------------|--------------|-----------------|---------------------|-------------------|-------------------|---------------------|------------------|----------------------|-------------------------|--------|
|                |              | $mIoU \uparrow$ | $\delta_1 \uparrow$ | $rmse \downarrow$ | $mean \downarrow$ | $median \downarrow$ | 11.25 $\uparrow$ | $Acc_{MTL} \uparrow$ | $\Delta_{MTL} \uparrow$ | $time$ |
| Single-Task    |              | 0.4437          | 0.8087              | 0.5814            | 19.3462           | 13.2045             | 0.4553           | 0.3989               | -                       |        |
| Constant       | Uniform      | 0.4443          | 0.8150              | 0.5766            | 22.3212           | 16.3137             | 0.3738           | 0.3763               | -6.00%                  | 43.31  |
| Scale-based    | RLW [8]      | 0.4471          | 0.8130              | 0.5725            | 22.3235           | 16.3094             | 0.3741           | 0.3774               | -5.71%                  | 43.22  |
|                | DWA [11]     | 0.4466          | 0.8141              | 0.5730            | 22.3439           | 16.3962             | 0.3721           | 0.3768               | -5.87%                  | 43.01  |
|                | GLS [5]      | 0.4397          | 0.8220              | 0.5681            | 20.5555           | 14.5141             | 0.4156           | 0.3895               | -2.41%                  | 43.28  |
| Gradient-based | MGDA [13]    | 0.3863          | 0.8008              | 0.5840            | 19.6941           | 13.5648             | 0.4437           | 0.3770               | -5.34%                  | 88.97  |
|                | PCGrad [17]  | 0.4468          | 0.8111              | 0.5763            | 23.4195           | 17.4143             | 0.3532           | 0.3697               | -7.95%                  | 63.91  |
|                | CAGrad [9]   | 0.4467          | 0.8106              | 0.5793            | 23.4502           | 17.4594             | 0.3513           | 0.3689               | -8.15%                  | 63.01  |
|                | GradNorm [4] | 0.4455          | 0.8167              | 0.5715            | 22.3188           | 16.3126             | 0.3734           | 0.3773               | -5.74%                  | 57.90  |
|                | IMTL-G [10]  | 0.4268          | 0.8199              | 0.5665            | 19.8490           | 13.7477             | 0.4377           | 0.3917               | -1.79%                  | 57.89  |
|                | IMTL [10]    | 0.4218          | 0.8074              | 0.5783            | 20.6877           | 14.5346             | 0.4161           | 0.3815               | -4.43%                  | 99.27  |
| Accuracy-based | DTP [6]      | 0.4436          | 0.7958              | 0.5951            | 22.1462           | 16.1081             | 0.3773           | 0.3739               | -6.63%                  | 43.43  |
|                | AMTL         | 0.4414          | 0.8207              | 0.5674            | 20.5774           | 14.5073             | 0.4160           | 0.3899               | -2.29%                  | 44.08  |

Table D. Comparison to the benchmark and proposed multi-task losses for the DeepLabV3 prediction head with individual ASPP on the NYU v2 dataset.

| methods        |              | segmentation    | depth estimation    |                   | surface normal    |                     |                  | total                |                         |        |
|----------------|--------------|-----------------|---------------------|-------------------|-------------------|---------------------|------------------|----------------------|-------------------------|--------|
|                |              | $mIoU \uparrow$ | $\delta_1 \uparrow$ | $rmse \downarrow$ | $mean \downarrow$ | $median \downarrow$ | $11.25 \uparrow$ | $Acc_{MTL} \uparrow$ | $\Delta_{MTL} \uparrow$ | $time$ |
| Single-Task    |              | 0.4449          | 0.8054              | 0.5801            | 19.4138           | 13.2616             | 0.4536           | 0.3986               | -                       |        |
| Constant       | Uniform      | 0.4437          | 0.8142              | 0.5726            | 22.2965           | 16.3707             | 0.3716           | 0.3762               | -5.96%                  | 45.61  |
| Scale-based    | RLW [8]      | 0.4457          | 0.8132              | 0.5769            | 22.2547           | 16.3355             | 0.3723           | 0.3764               | -5.88%                  | 43.37  |
|                | DWA [11]     | 0.4445          | 0.8140              | 0.5757            | 22.2624           | 16.3621             | 0.3715           | 0.3761               | -5.97%                  | 43.83  |
|                | GLS [5]      | 0.4386          | 0.8211              | 0.5657            | 20.6328           | 14.6300             | 0.4128           | 0.3885               | -2.58%                  | 44.12  |
| Gradient-based | MGDA [13]    | 0.3950          | 0.8022              | 0.5833            | 19.7439           | 13.6664             | 0.4406           | 0.3793               | -4.75%                  | 90.15  |
|                | PCGrad [17]  | 0.4454          | 0.8114              | 0.5768            | 23.0143           | 17.1312             | 0.3562           | 0.3710               | -7.44%                  | 64.25  |
|                | CAGrad [9]   | 0.4467          | 0.8104              | 0.5789            | 23.0637           | 17.1736             | 0.3552           | 0.3708               | -7.51%                  | 63.75  |
|                | GradNorm [4] | 0.4458          | 0.8136              | 0.5767            | 22.3320           | 16.4119             | 0.3705           | 0.3760               | -6.02%                  | 59.13  |
|                | IMTL-G [10]  | 0.4396          | 0.8161              | 0.5680            | 20.3185           | 14.2563             | 0.4230           | 0.3910               | -1.93%                  | 58.67  |
|                | IMTL [10]    | 0.4240          | 0.8055              | 0.5837            | 20.7662           | 14.6261             | 0.4134           | 0.3807               | -4.57%                  | 103.50 |
| Accuracy-based | DTP [6]      | 0.4463          | 0.8012              | 0.5874            | 22.2058           | 16.2499             | 0.3743           | 0.3751               | -6.24%                  | 43.10  |
|                | AMTL         | 0.4251          | 0.8249              | 0.5636            | 20.2782           | 14.1928             | 0.4247           | 0.3883               | -2.59%                  | 43.39  |

Table E. Comparison to the benchmark and proposed multi-task losses for the DeepLabV3+ prediction head with individual ASPP on the NYU v2 dataset.

| methods        |              | segmentation    | depth estimation    |                   | surface normal    |                     |                  | total                |                         |        |
|----------------|--------------|-----------------|---------------------|-------------------|-------------------|---------------------|------------------|----------------------|-------------------------|--------|
|                |              | $mIoU \uparrow$ | $\delta_1 \uparrow$ | $rmse \downarrow$ | $mean \downarrow$ | $median \downarrow$ | $11.25 \uparrow$ | $Acc_{MTL} \uparrow$ | $\Delta_{MTL} \uparrow$ | $time$ |
| Single-Task    |              | 0.3798          | 0.7685              | 0.6323            | 21.2734           | 14.8062             | 0.4151           | 0.3581               | -                       |        |
| Constant       | Uniform      | 0.3850          | 0.7761              | 0.6180            | 25.0320           | 19.8745             | 0.2976           | 0.3313               | -7.91%                  | 16.04  |
| Scale-based    | RLW [8]      | 0.3825          | 0.7706              | 0.6235            | 25.2629           | 20.1929             | 0.2914           | 0.3280               | -8.92%                  | 19.14  |
|                | DWA [11]     | 0.3836          | 0.7767              | 0.6185            | 24.9665           | 19.8221             | 0.2982           | 0.3311               | -7.94%                  | 19.08  |
|                | GLS [5]      | 0.3662          | 0.7930              | 0.6048            | 22.4388           | 16.6333             | 0.3633           | 0.3464               | -3.30%                  | 17.26  |
| Gradient-based | MGDA [13]    | 0.2578          | 0.7307              | 0.6646            | 20.8591           | 14.6106             | 0.4183           | 0.3109               | -11.93%                 | 32.31  |
|                | PCGrad [17]  | 0.3855          | 0.7653              | 0.6284            | 26.5895           | 21.7927             | 0.2674           | 0.3204               | -11.44%                 | 23.71  |
|                | CAGrad [9]   | 0.3843          | 0.7670              | 0.6270            | 26.5724           | 21.8092             | 0.2670           | 0.3202               | -11.48%                 | 23.61  |
|                | GradNorm [4] | 0.3841          | 0.7570              | 0.6339            | 24.1916           | 18.6917             | 0.3213           | 0.3346               | -6.87%                  | 20.96  |
|                | IMTL-G [10]  | 0.3646          | 0.7763              | 0.6181            | 21.5271           | 15.3898             | 0.3958           | 0.3513               | -1.88%                  | 21.04  |
|                | IMTL [10]    | 0.3619          | 0.7658              | 0.6298            | 22.0750           | 16.0011             | 0.3802           | 0.3445               | -3.82%                  | 35.06  |
| Accuracy-based | DTP [6]      | 0.3844          | 0.7310              | 0.6566            | 24.5180           | 19.0092             | 0.3150           | 0.3289               | -8.58%                  | 16.04  |
|                | AMTL         | 0.3696          | 0.7927              | 0.6070            | 22.3961           | 16.5574             | 0.3651           | 0.3476               | -2.95%                  | 16.25  |

Table F. Comparison to recent multi-task losses for the MobileNetv2 backbone and shared DeepLabV3+ prediction head on the NYU v2 dataset.

| methods        |              | segmentation    | depth estimation    |                   | surface normal    |                     |                  | total                |                         |        |
|----------------|--------------|-----------------|---------------------|-------------------|-------------------|---------------------|------------------|----------------------|-------------------------|--------|
|                |              | $mIoU \uparrow$ | $\delta_1 \uparrow$ | $rmse \downarrow$ | $mean \downarrow$ | $median \downarrow$ | 11.25 $\uparrow$ | $Acc_{MTL} \uparrow$ | $\Delta_{MTL} \uparrow$ | $time$ |
| Single-Task    |              | 0.4622          | 0.8300              | 0.5540            | 21.3341           | 16.0052             | 0.3730           | 0.3877               | -                       |        |
| Constant       | Uniform      | 0.4861          | 0.8335              | 0.5500            | 22.3076           | 17.1379             | 0.3458           | 0.3868               | -0.20%                  | 23.67  |
| Scale-based    | RLW [8]      | 0.4839          | 0.8284              | 0.5535            | 22.6282           | 17.4877             | 0.3377           | 0.3830               | -1.20%                  | 24.24  |
|                | DWA [11]     | 0.4856          | 0.8327              | 0.5479            | 22.2851           | 17.1112             | 0.3462           | 0.3870               | -0.14%                  | 24.29  |
|                | GLS [5]      | 0.4607          | 0.8427              | 0.5418            | 20.6434           | 15.1945             | 0.3942           | 0.3958               | 2.06%                   | 24.65  |
| Gradient-based | MGDA [13]    | 0.2915          | 0.7195              | 0.6470            | 20.0508           | 14.3504             | 0.4211           | 0.3268               | -14.08%                 | 58.70  |
|                | PCGrad [17]  | 0.4865          | 0.8238              | 0.5554            | 23.7069           | 18.8369             | 0.3094           | 0.3743               | -3.51%                  | 40.83  |
|                | CAGrad [9]   | 0.4881          | 0.8226              | 0.5580            | 23.7155           | 18.8571             | 0.3094           | 0.3742               | -3.52%                  | 42.19  |
|                | GradNorm [4] | 0.4889          | 0.8091              | 0.5639            | 21.9632           | 16.6797             | 0.3573           | 0.3873               | -0.06%                  | 31.59  |
|                | IMTL-G [10]  | 0.4710          | 0.8113              | 0.5639            | 20.1275           | 14.4924             | 0.4155           | 0.3991               | 2.90%                   | 29.22  |
|                | IMTL [10]    | 0.4725          | 0.8019              | 0.5699            | 20.6113           | 15.0365             | 0.3995           | 0.3936               | 1.54%                   | 43.88  |
| Accuracy-based | DTP [6]      | 0.4876          | 0.7733              | 0.5911            | 21.6803           | 16.2800             | 0.3672           | 0.3837               | -0.97%                  | 24.36  |
|                | AMTL         | 0.4710          | 0.8426              | 0.5396            | 20.6636           | 15.2123             | 0.3941           | 0.3989               | 2.85%                   | 24.40  |

Table G. Comparison to recent multi-task losses for the EfficientNetV2-S backbone and the DeepLabV3+ prediction head with shared ASPP on the NYU v2 dataset.

| methods        |              | segmentation    | depth estimation    |                   | total                |                         |        |
|----------------|--------------|-----------------|---------------------|-------------------|----------------------|-------------------------|--------|
|                |              | $mIoU \uparrow$ | $\delta_1 \uparrow$ | $rmse \downarrow$ | $Acc_{MTL} \uparrow$ | $\Delta_{MTL} \uparrow$ | $time$ |
| Single-Task    |              | 0.4437          | 0.8087              | 0.5814            | 0.7234               | 0.00%                   | -      |
| Constant       | Uniform      | 0.4464          | 0.7994              | 0.5809            | 0.7236               | 0.03%                   | 29.49  |
| Scale-based    | RLW [8]      | 0.4458          | 0.7996              | 0.5816            | 0.7230               | -0.06%                  | 33.30  |
|                | DWA [11]     | 0.4484          | 0.7995              | 0.5853            | 0.7239               | 0.08%                   | 29.29  |
|                | GLS [5]      | 0.4397          | 0.8091              | 0.5755            | 0.7221               | -0.19%                  | 29.01  |
| Gradient-based | MGDA [13]    | 0.4439          | 0.8098              | 0.5770            | 0.7252               | 0.25%                   | 58.78  |
|                | PCGrad [17]  | 0.4429          | 0.7936              | 0.5903            | 0.7166               | -0.94%                  | 43.40  |
|                | CAGrad [9]   | 0.4441          | 0.7925              | 0.5944            | 0.7161               | -1.02%                  | 43.05  |
|                | GradNorm [4] | 0.4477          | 0.7806              | 0.6013            | 0.7142               | -1.28%                  | 32.65  |
|                | IMTL-G [10]  | 0.4414          | 0.8021              | 0.5810            | 0.7201               | -0.46%                  | 33.12  |
|                | IMTL [10]    | 0.4323          | 0.7832              | 0.5976            | 0.7035               | -2.78%                  | 53.60  |
| Accuracy-based | DTP [6]      | 0.4452          | 0.7590              | 0.6124            | 0.7040               | -2.70%                  | 29.69  |
|                | AMTL         | 0.4439          | 0.8083              | 0.5771            | 0.7248               | 0.20%                   | 29.97  |

Table H. Comparison to recent multi-task losses for semantic segmentation and depth estimation on the NYU v2 dataset.

## B.5. Effect of Dropout for Gradient-based Multi-task Losses

Following TorchVision’s implementation, our ASPP incorporated dropout with a rate of 0.5. Dropout is an effective regularization technique. However, unfortunately, it perturbs the gradients of trainable parameters, thereby affecting gradient-based multi-task losses. We compared the multi-task accuracy of gradient-based multi-task losses and the proposed one, both with and without dropout (Table I).

Due to employing task gradients of all the parameters in an iterative optimization process to determine task weights, MGDA [13] demonstrated the most notable improvement in accuracy upon excluding dropout. PCGrad [17] and CAGrad [9] also utilize all gradients to resolve conflict (but they use only once), leading to significant improvement. In contrast, as GradNorm [4] and IMTL-G [10] use only the task gradients of the last shared layer, their accuracy improvements were more modest. The proposed loss provided a slight increase in accuracy.

| methods      | w/ dropout | w/o dropout | Improv. |
|--------------|------------|-------------|---------|
| MGDA [13]    | 0.3229     | 0.3576      | 10.75%  |
| PCGrad [17]  | 0.3558     | 0.3664      | 2.98%   |
| CAGrad [9]   | 0.3556     | 0.3663      | 3.01%   |
| GradNorm [4] | 0.3690     | 0.3708      | 0.49%   |
| IMTL-G [10]  | 0.3846     | 0.3876      | 0.78%   |
| AMTL         | 0.3847     | 0.3861      | 0.36%   |

Table I. Comparison of  $Acc_{MTL}$  to the gradient-based and proposed multi-task losses on the NYU v2 dataset.

## C. Training Details for the VOC+NYU dataset

### C.1. Preprocessing

Images by the PASCAL VOC dataset were resized to 640x640 while images by the NYU datasets were 480x640. Hence, we applied zero padding to expand NYU images without geometric distortion. Then, geometric and photometric augmentations were conducted.

### C.2. Network Architecture

We employed EfficientDet [15] as the baseline architecture and EfficientNetV2-S [14] as the backbone. We extracted 3-level features from the backbone, with sizes of 1/16, 1/32, and 1/64. The extracted features passed through a two-stage bi-directional Feature Pyramid Network (bi-FPN) [15] with a channel size of 64 before being supplied to the task-specific prediction heads. The prediction heads were composed of two inverted residual blocks [12] with

a channel size of 64. The detection head generated predictions using multi-level features, while pixel-level predictions (segmentation and depth) were made by resizing the features to the largest size (1/16) and concatenating them before making predictions.

### C.3. Training configurations

We trained single-task and multi-task models for 200 epochs with a batch size of 32. We adopted an ADAMW optimizer with a momentum of 0.9 and a weight decay of  $5e-6$ . The learning rate was warmed up during two epochs and scheduled by ReduceOnPlateau so that it was reduced by 1/10 whenever  $Acc_{MTL}$  was not improved during 20 epochs. We used learning rates of  $4e-4$ ,  $2e-4$ ,  $1e-4$ ,  $8e-5$ , and  $4e-5$ . Then, we presented the results with the best  $Acc_{MTL}$  in Table 7.

## References

- [1] Shiyu Chang, Yang Zhang, Wei Han, Mo Yu, Xiaoxiao Guo, Wei Tan, Xiaodong Cui, Michael Witbrock, Mark A Hasegawa-Johnson, and Thomas S Huang. Dilated recurrent neural networks. *Advances in neural information processing systems*, 30, 2017. 1
- [2] Liang-Chieh Chen, George Papandreou, Florian Schroff, and Hartwig Adam. Rethinking atrous convolution for semantic image segmentation. *arXiv preprint arXiv:1706.05587*, 2017. 1
- [3] Liang-Chieh Chen, Yukun Zhu, George Papandreou, Florian Schroff, and Hartwig Adam. Encoder-decoder with atrous separable convolution for semantic image segmentation. In *Proceedings of the European conference on computer vision (ECCV)*, pages 801–818, 2018. 1
- [4] Zhao Chen, Vijay Badrinarayanan, Chen-Yu Lee, and Andrew Rabinovich. Gradnorm: Gradient normalization for adaptive loss balancing in deep multitask networks. In *International Conference on Machine Learning*, pages 794–803. PMLR, 2018. 2, 3, 4, 5
- [5] Sumanth Chennupati, Ganesh Sistu, Senthil Yogamani, and Samir A Rawashdeh. Multinet++: Multi-stream feature aggregation and geometric loss strategy for multi-task learning. In *Proceedings of the IEEE/CVF conference on computer vision and pattern recognition (CVPR) Workshops*, pages 0–0, 2019. 2, 3, 4
- [6] Michelle Guo, Albert Haque, De-An Huang, Serena Yeung, and Li Fei-Fei. Dynamic task prioritization for multitask learning. In *Proceedings of the European Conference on Computer Vision (ECCV)*, pages 270–287, 2018. 2, 3, 4
- [7] Kaiming He, Xiangyu Zhang, Shaoqing Ren, and Jian Sun. Deep residual learning for image recognition. In *Proceedings of the IEEE conference on computer vision and pattern recognition*, pages 770–778, 2016. 1
- [8] Baijiong Lin, YE Feiyang, Yu Zhang, and Ivor Tsang. Reasonable effectiveness of random weighting: A litmus test for multi-task learning. *Transactions on Machine Learning Research*, 2022. 1, 2, 3, 4

- [9] Bo Liu, Xingchao Liu, Xiaojie Jin, Peter Stone, and Qiang Liu. Conflict-averse gradient descent for multi-task learning. *Advances in Neural Information Processing Systems*, 34:18878–18890, 2021. 1, 2, 3, 4, 5
- [10] Liyang Liu, Yi Li, Zhanghui Kuang, J Xue, Yimin Chen, Wenming Yang, Qingmin Liao, and Wayne Zhang. Towards impartial multi-task learning. In *International Conference on Learning Representations*, 2021. 2, 3, 4, 5
- [11] Shikun Liu, Edward Johns, and Andrew J Davison. End-to-end multi-task learning with attention. In *Proceedings of the IEEE/CVF conference on computer vision and pattern recognition*, pages 1871–1880, 2019. 2, 3, 4
- [12] Mark Sandler, Andrew Howard, Menglong Zhu, Andrey Zhmoginov, and Liang-Chieh Chen. Mobilenetv2: Inverted residuals and linear bottlenecks. In *Proceedings of the IEEE/CVF conference on computer vision and pattern recognition*, pages 4510–4520, 2018. 1, 5
- [13] Ozan Sener and Vladlen Koltun. Multi-task learning as multi-objective optimization. *Advances in Neural Information Processing Systems*, 31, 2018. 2, 3, 4, 5
- [14] Mingxing Tan and Quoc Le. Efficientnetv2: Smaller models and faster training. In *International conference on machine learning*, pages 10096–10106. PMLR, 2021. 5
- [15] Mingxing Tan, Ruoming Pang, and Quoc V Le. Efficientdet: Scalable and efficient object detection. In *Proceedings of the IEEE/CVF conference on computer vision and pattern recognition*, pages 10781–10790, 2020. 5
- [16] Simon Vandenhende, Stamatios Georgoulis, and Luc Van Gool. Mti-net: Multi-scale task interaction networks for multi-task learning supplementary materials. 1
- [17] Tianhe Yu, Saurabh Kumar, Abhishek Gupta, Sergey Levine, Karol Hausman, and Chelsea Finn. Gradient surgery for multi-task learning. *Advances in Neural Information Processing Systems*, 33:5824–5836, 2020. 2, 3, 4, 5
